# Supplementary material for: Transcriptional landscapes at the intersection of neuronal apoptosis and substance P-induced survival: exploring pathways and drug targets
Source: PubMed Central journal article supplement (PMC4979452; doi:10.1038/cddiscovery.2016.50), 2016-08-01
Supplement: cddiscovery201650-s1.pdf [file cddiscovery201650-s1.pdf]

**Table 1. Validation of microarray data by real-time quantitative RT-PCR.**

| Name                                                      | Genbank       | K25        | K5         | K5 + SP    | Forward primer       | Reverse primer         |
|-----------------------------------------------------------|---------------|------------|------------|------------|----------------------|------------------------|
| Early growth response protein 1 (Egr1)                    | U75397        | -0,94      | 0,11       | 1,58       | GTTGGAATGCTGTGGTTACC | GCCAAACAAGTCACTTTGTTTA |
|                                                           |               | 1475 ± 85  | 3019 ± 108 | 3361 ± 102 |                      |                        |
| NIPA-like domain containing 2 (Nipal2)                    | NM_001130559  | -1,26      | -0,22      | 0,71       | ACATGGAGAAGCAACCTCTG | CTCCGTAATTGTCAGCAGCT   |
|                                                           |               | 667 ± 16   | 2011 ± 91  | 4065 ± 133 |                      |                        |
| Family with sequence similarity 171, member A2 (Fam171a2) | XM_001081512  | 0,11       | -0,63      | -1,58      | AGGACAACGTGTACCGCAAT | TGGGGATCAGGTTGAGGGAA   |
|                                                           |               | 2877 ± 128 | 1136 ± 92  | 871 ± 65   |                      |                        |
| DEAD (Asp-Glu-Ala-Asp) box helicase 56 (Ddx56)            | NM_0010042112 | 0,35       | -0,53      | 0,18       | TCTTAGGCTGTCACCGACTT | ATTAGCCACTCTCACATCGC   |
|                                                           |               | 2493 ± 106 | 163 ± 12   | 2166 ± 77  |                      |                        |
| Zinc finger protein 423 (Zfp423)                          | XM_001081512  | -1,23      | -0,27      | 0,59       | GAAGACAGGAACAGCGTGAC | GTCGTCATCACCATCTCCAG   |
|                                                           |               | 277 ± 31   | 856 ± 35   | 3184 ± 69  |                      |                        |
| Neuronal pentraxin I (Nptx1)                              | NM_153735     | -1,50      | -0,39      | 1,14       | GGAGCTGAATGGTTACATGG | ATAAGTCCACTGCGCACAGA   |
|                                                           |               | 781 ± 32   | 2630 ± 85  | 4502 ± 181 |                      |                        |

Microarray: mean normalized value (Log scale)

Quantitative RT-PCR: mean ± SEM of copies/100 pg RT-RNA
