# Supplementary material for: Transcriptional landscapes at the intersection of neuronal apoptosis and substance P-induced survival: exploring pathways and drug targets
Source: PubMed Central journal article supplement (PMC4979452; doi:10.1038/cddiscovery.2016.50), 2016-08-01

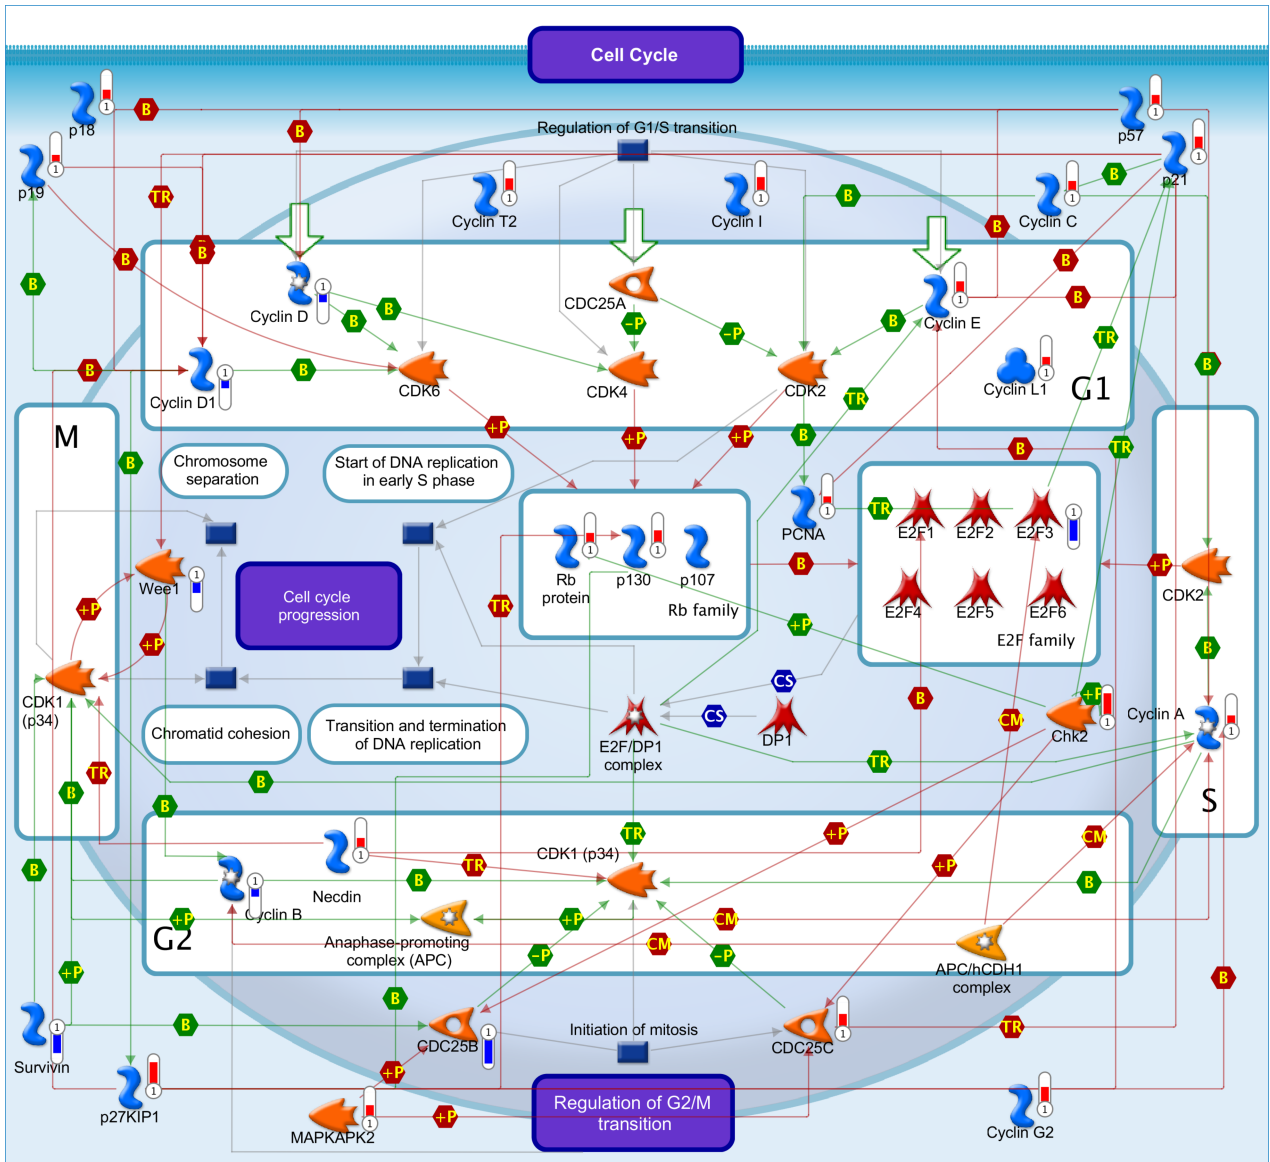

Supplement: cddiscovery201650-s6.pdf [file cddiscovery201650-s6.pdf]
